# Supplementary material for: Super-assembly of ER-phagy receptor Atg40 induces local ER remodeling at contacts with forming autophagosomal membranes
Source: PubMed Central journal article supplement (PMC7335187; doi:10.1038/s41467-020-17163-y), 2020-07-03
Supplement: 41467_2020_17163_MOESM1_ESM.pdf [file 41467_2020_17163_MOESM1_ESM.pdf]

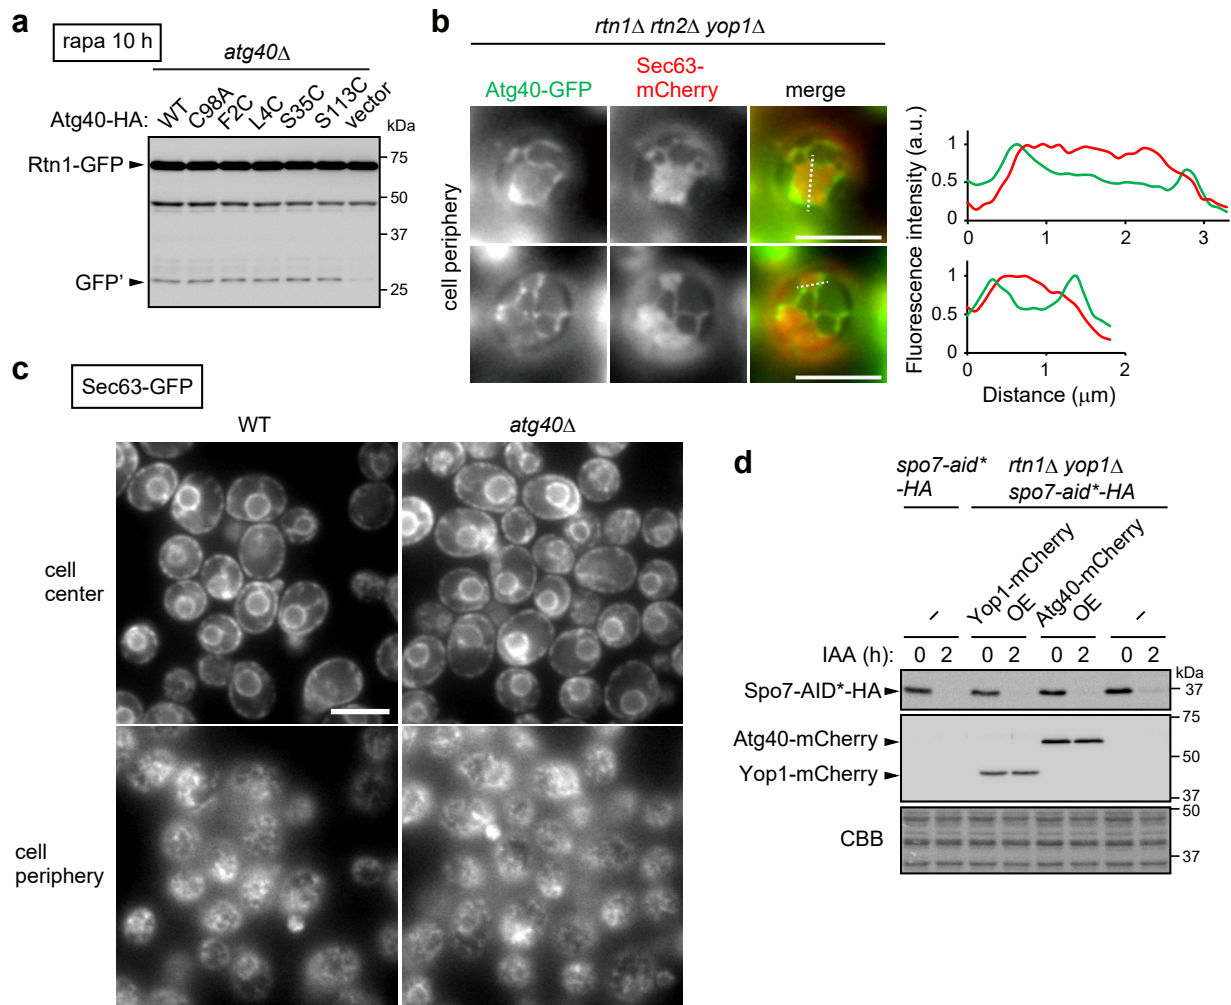

**Supplementary Fig. 1.** Atg40 is a reticulon-like protein that is dispensable for maintenance of overall ER structure.

**a.** Degradation of Rtn1-GFP in cells expressing Atg40-HA variants was measured by immunoblotting using an antibody against GFP. The amounts of GFP fragments (GFP'), which are generated by vacuolar cleavage of Rtn1-GFP, correlate with ER-phagy activity of the cells.

**b.** ER structure and localization of Atg40 in *rtn1Δ rtn2Δ yop1Δ* cells were analyzed by fluorescence microscopy of the cell periphery, showing that Atg40-GFP localized to the ER tubules and the edge of the ER sheets. Line scan analysis of dashed line shows the normalized fluorescence intensity.

**c.** ER morphology in *atg40Δ* cells was analyzed by fluorescence microscopy.

**d.** IAA-induced degradation of Spo7-AID\*-HA was confirmed by immunoblotting using anti-HA antibody. CBB-stained membrane served as a loading control.

The experiments were repeated independently twice (a, b, d) or three times (c). Scale bars, 5 μm.

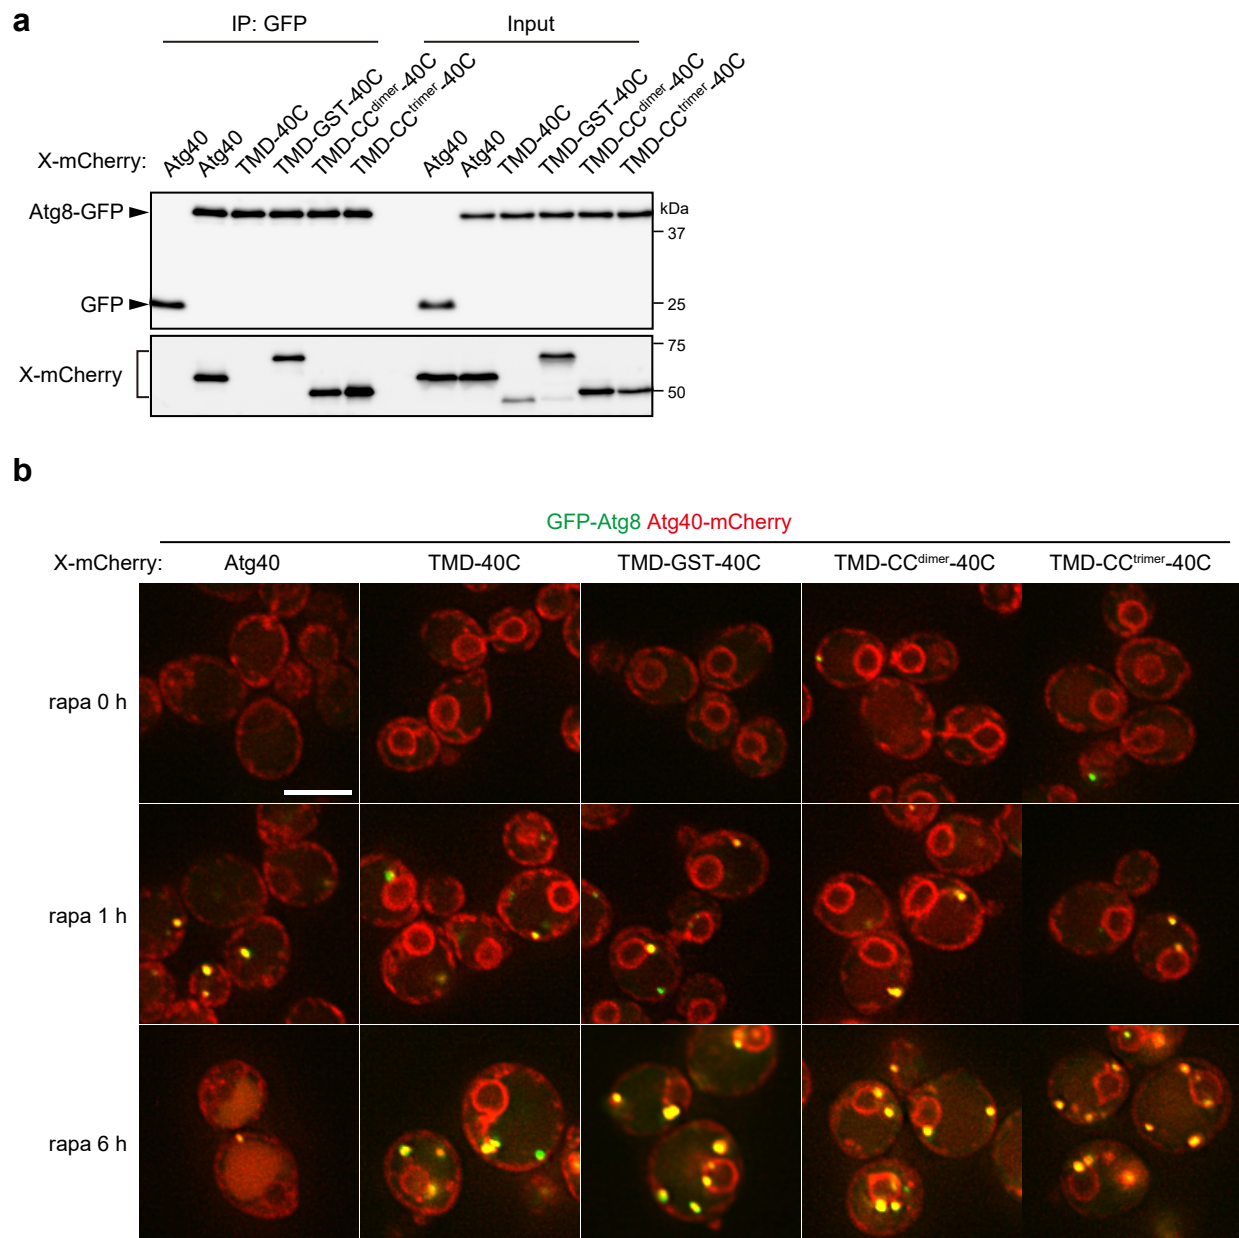

**Supplementary Fig. 2.** Non-reticulon-like proteins fused with the Atg40 C-terminal region form puncta depending on rapamycin treatment.

**a.** *ATG8-GFP atg4Δ atg40Δ* cells constitutively expressing the mCherry-tagged fusion proteins were treated with rapamycin for 6 h. Cell lysates (input) were subjected to immunoprecipitation using anti-GFP antibody, and immunoprecipitates (IP) were analyzed by immunoblotting using antibodies against GFP and mCherry.

**b.** *atg40Δ* cells constitutively expressing the mCherry-tagged fusion proteins were treated with rapamycin and analyzed by fluorescence microscopy. The images are maximum-intensity projections of Z-stacks (7 plane stacks, 0.2 μm spacing). The quantification results are shown in Fig 2d. Scale bars, 5 μm.

The experiments were repeated independently twice (a) or three times (b).

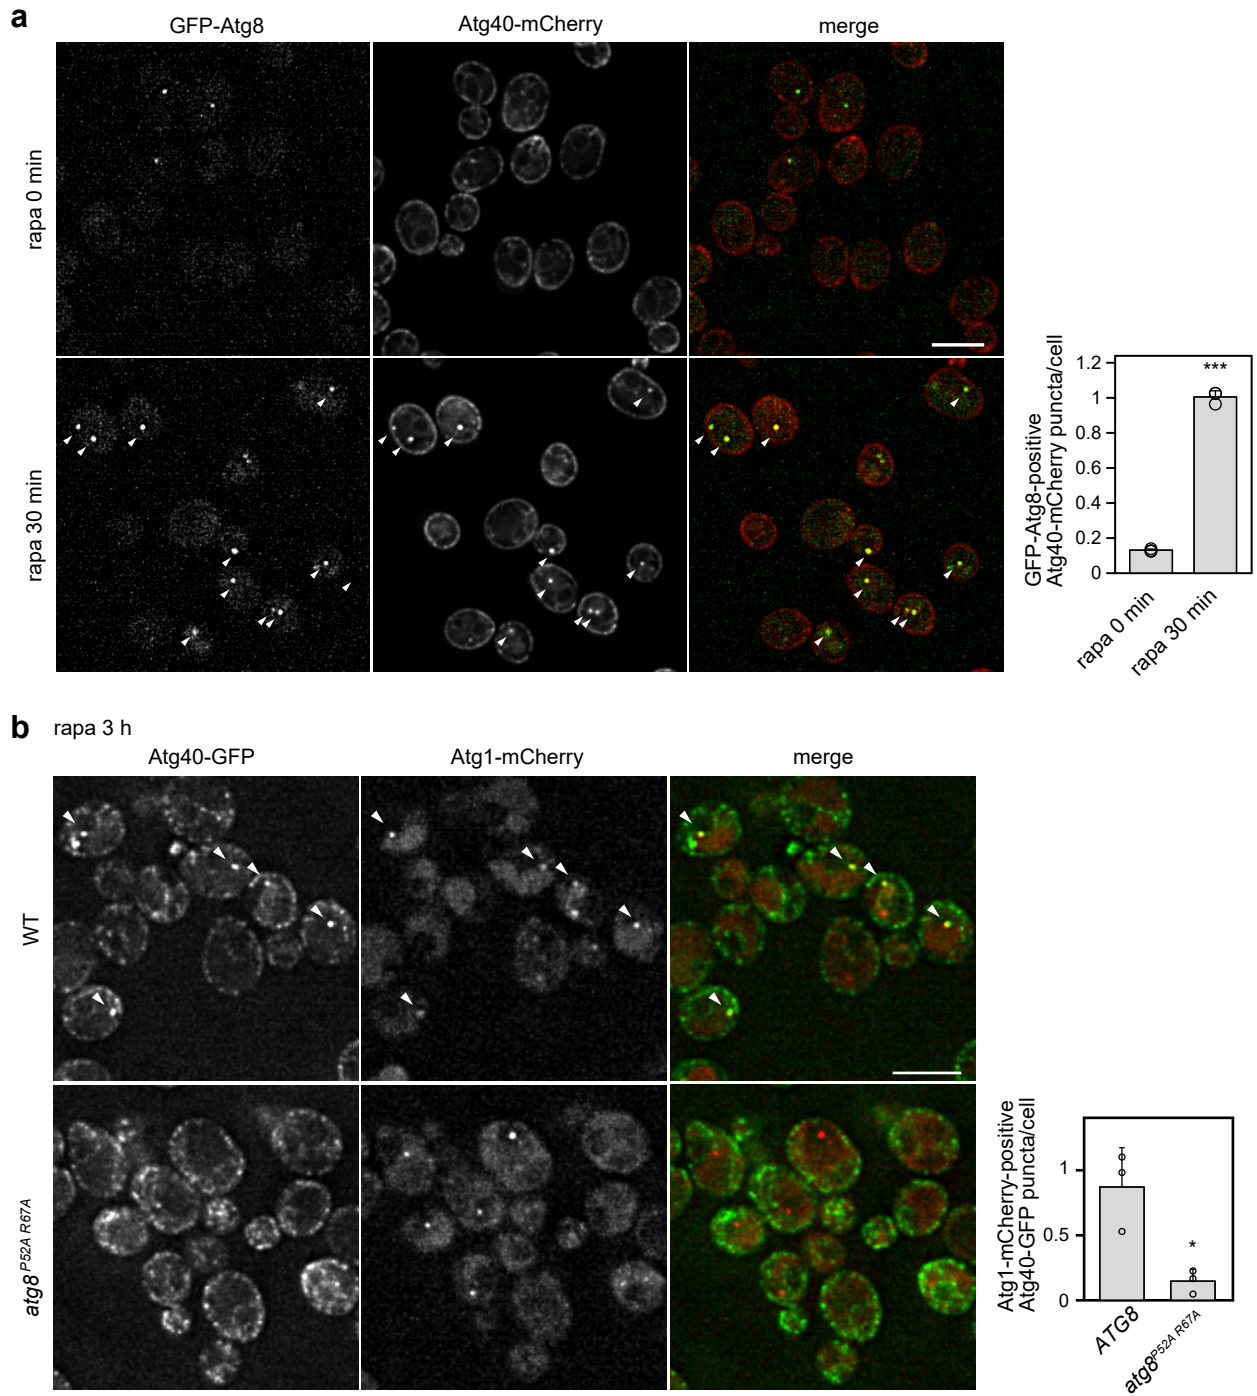

**Supplementary Fig. 3.** Atg40 assembly depends on rapamycin treatment and the binding to Atg8.

**a.** *GFP-ATG8* cells expressing Atg40-mCherry under the control of the *ADH* promoter were treated with rapamycin and analyzed by fluorescence microscopy. Arrowheads, GFP-Atg8-positive Atg40-mCherry puncta.

**b.** Cells coexpressing Atg40-GFP and Atg1-mCherry were treated with rapamycin and analyzed by fluorescence microscopy. The Atg8<sup>P52A R67A</sup> mutant is defective in the interaction with Atg40. Arrowheads, Atg1-mCherry-positive Atg40-GFP puncta.

The quantification results are shown as means  $\pm$  s.d. ( $n=3$ ). \*\*\* $P = 1.97 \times 10^{-6}$  (a), \* $P = 0.0164$  (b) (unpaired two-tailed Student's *t*-test). Scale bars, 5  $\mu$ m.



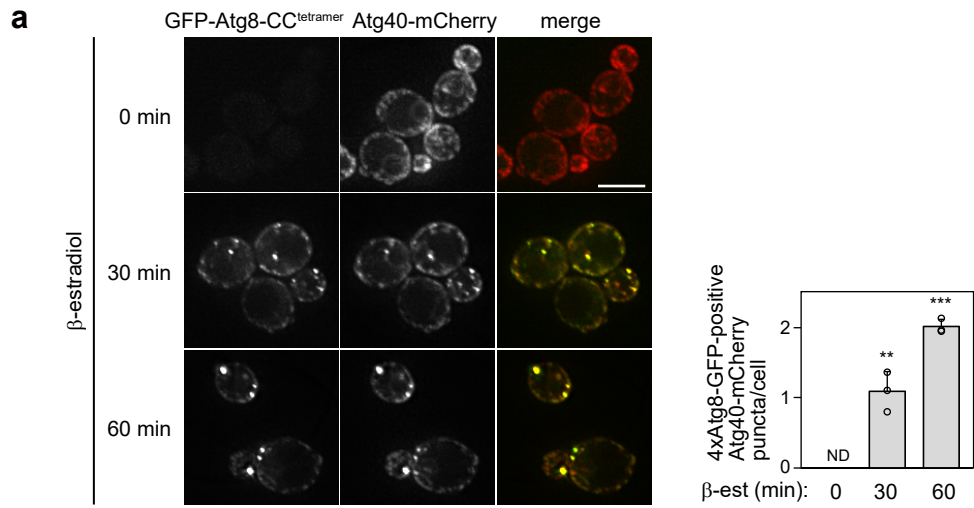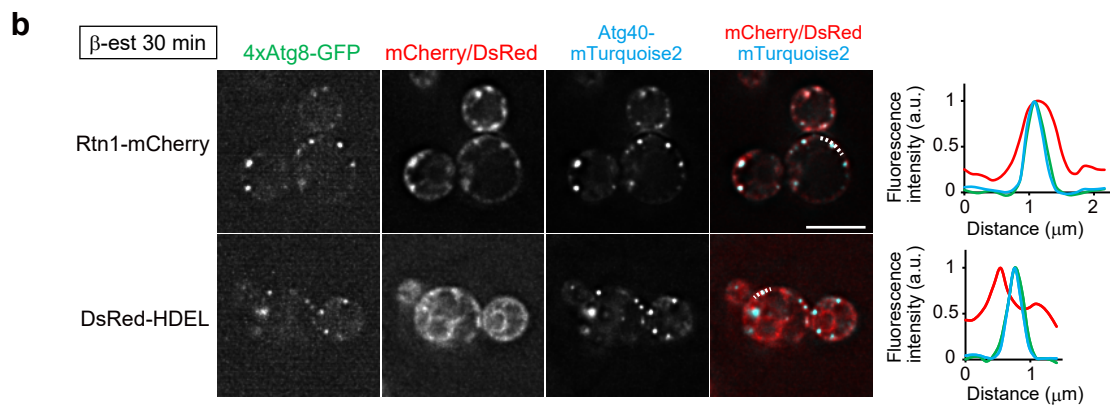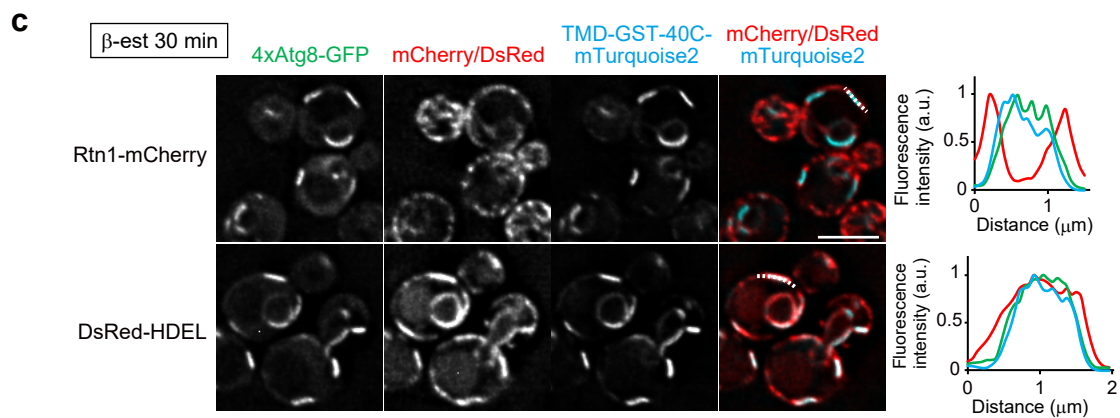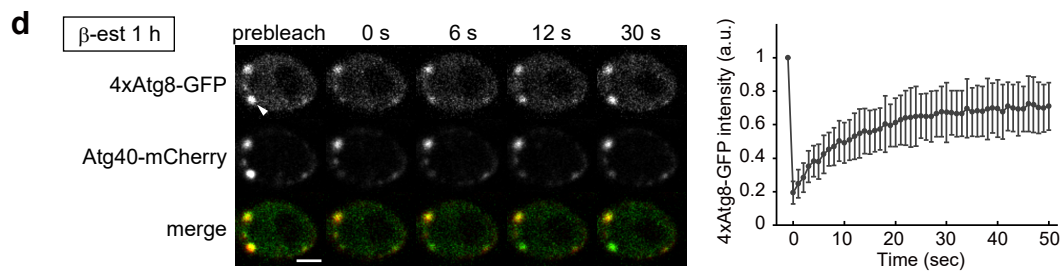



**Supplementary Fig. 4.** Characterization of 4×Atg8-induced Atg40 assemblies.

**a.** Cells coexpressing Atg40-mCherry and GFP-Atg8-CC<sup>tetramer</sup> under the constitutive *ADH* promoter and the  $\beta$ -estradiol-inducible promoter, respectively, were analyzed by fluorescence microscopy.  $\beta$ -estradiol treatment induced expression of GFP-Atg8-CC<sup>tetramer</sup> and clustering of Atg40-mCherry. The quantification results are shown as means  $\pm$  s.d. (n=3). \*\* $P = 0.00259$  (30 min), \*\*\* $P = 4.53 \times 10^{-6}$  (60 min) (unpaired two-tailed Student's *t*-test).

**b–d.** Cells were treated with  $\beta$ -estradiol for 30 min (b, c) or 1 h (d) to induce 4×Atg8-GFP expression, and then analyzed by fluorescence microscopy. Line scan analysis of dashed line shows the normalized fluorescence intensity (b, c). In (d), images before and after photobleaching the 4×Atg8-GFP fluorescence at the indicated region (arrowheads) are shown. The normalized fluorescence intensity of the bleached regions was quantified and shown as means  $\pm$  s.d. (n=13).

Scale bars, 5  $\mu\text{m}$  (a-c), 2  $\mu\text{m}$  (d).

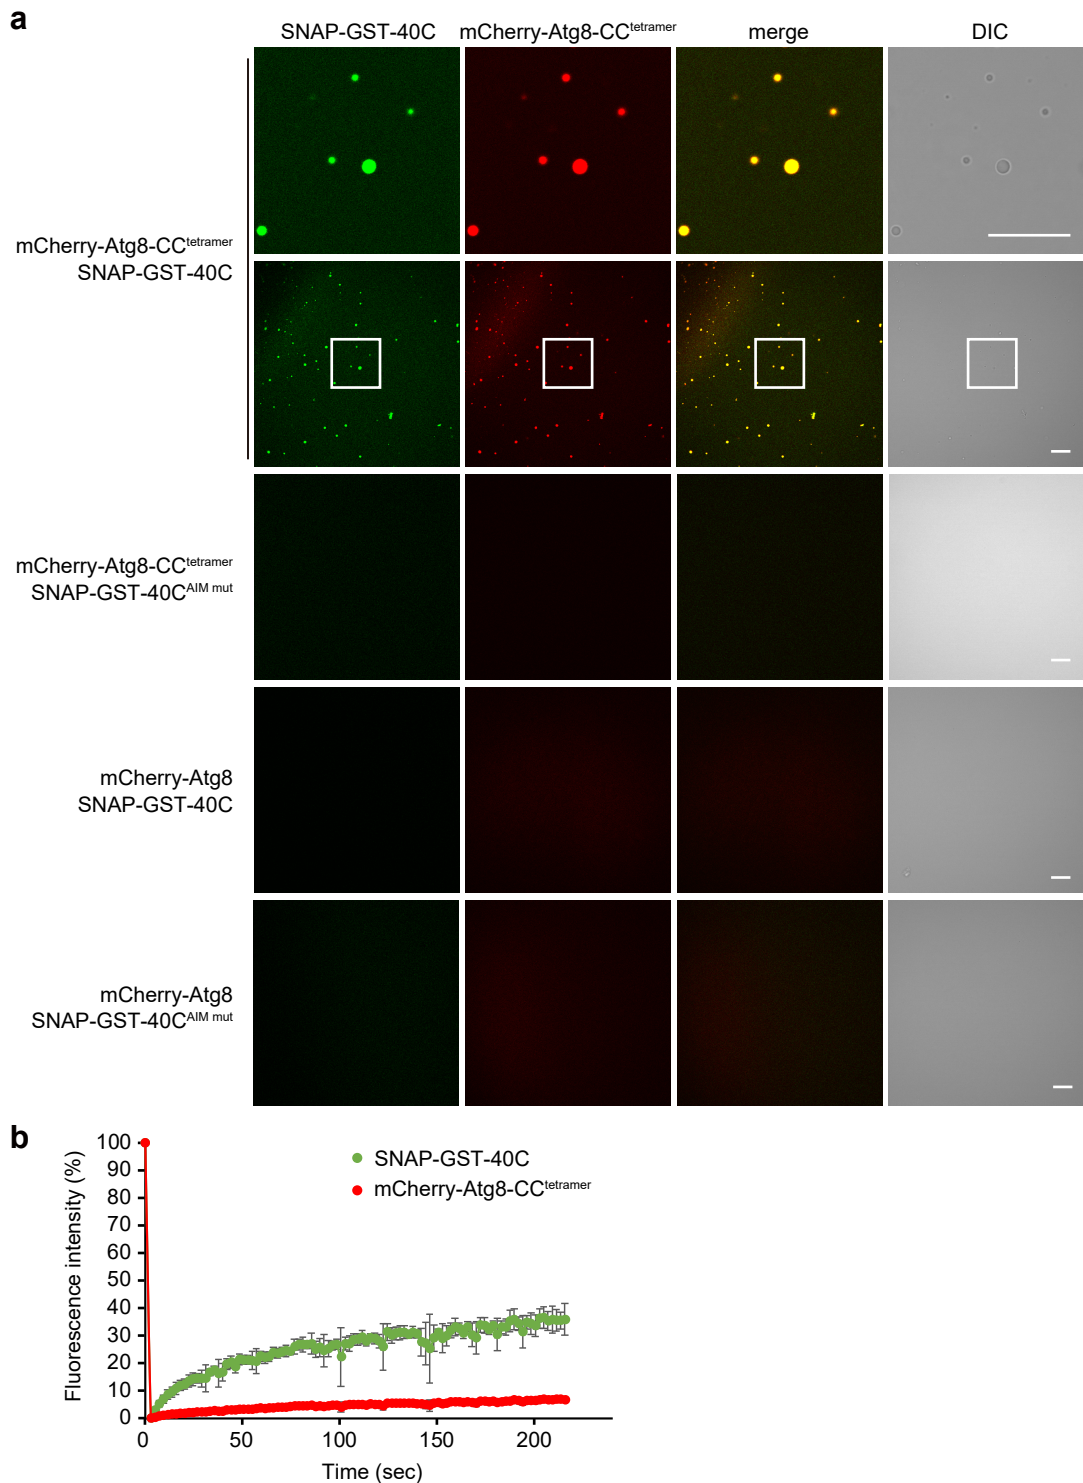

**Supplementary Fig. 5.** Multivalent interaction between tetramerized Atg8 and the dimerized C-terminal segment of Atg40 induces the formation of phase-separated droplets.

**a.** 10  $\mu$ M mCherry-Atg8 or mCherry-Atg8-CC<sup>tetramer</sup> was mixed with 10  $\mu$ M SNAP-GST-40C or SNAP-GST-40C<sup>AIMmut</sup> labeled with Alexa Fluor 488 and analyzed by confocal microscopy. The experiments were repeated independently twice. Scale bars, 20  $\mu$ m.

**b.** FRAP analysis was performed on the protein condensates of mCherry-Atg8-CC<sup>tetramer</sup> and SNAP-GST-40C in (a). Relative fluorescence intensity at the photobleached region was measured and the quantification results are shown as means  $\pm$  s.d. (n=4).

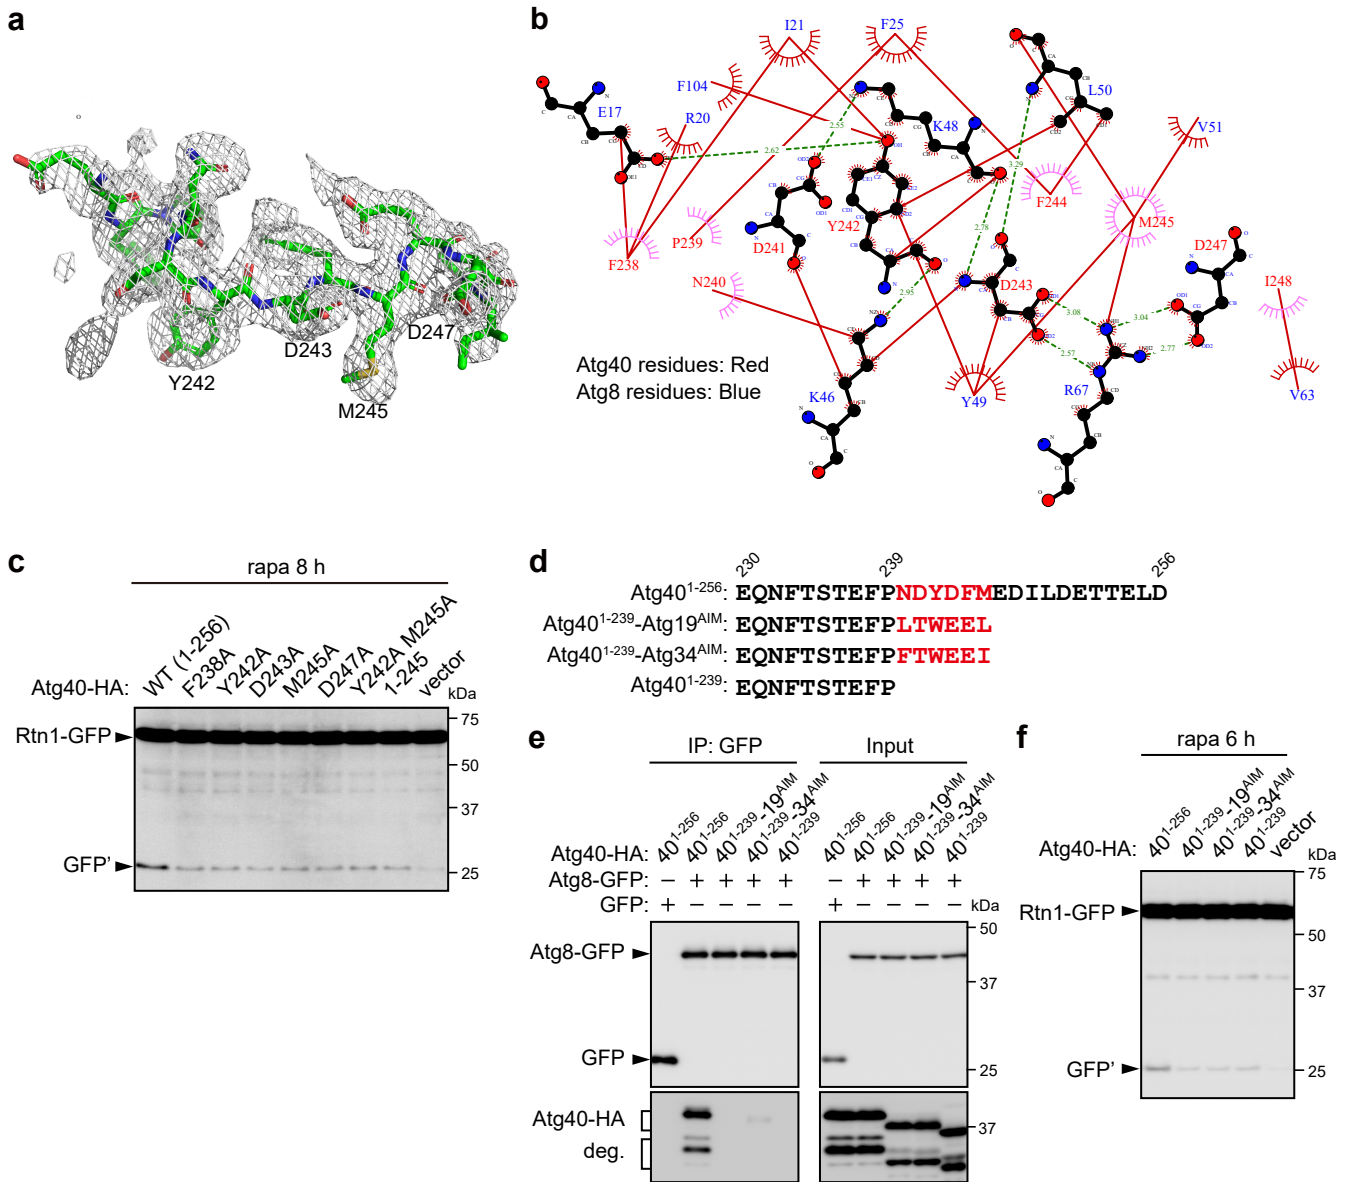

**Supplementary Fig. 6.** Atg8 binding of Atg40, enhanced by accessory interactions, is important for ER-phagy.

**a.** An unbiased  $mF_o-DF_c$  electron density map with Atg40 AIM (Atg40<sup>237-249</sup>) contoured at 3  $\sigma$ .

**b.** A two-dimensional protein interaction diagram for Atg40<sup>237-252</sup>-Atg8.

**c, f.** ER-phagy activity in *atg40* $\Delta$  cells expressing the Atg40 mutants was assessed by monitoring vacuolar cleavage of Rtn1-GFP.

**d.** Amino acid sequences of the C-terminal region of Atg40 and the chimera proteins with the AIMs of Atg19 and Atg34 (Atg40<sup>1-239</sup>-Atg19<sup>AIM</sup> and Atg40<sup>1-239</sup>-Atg34<sup>AIM</sup>), respectively.

**e.** *ATG8-GFP atg4* $\Delta$  *atg40* $\Delta$  cells expressing Atg40-HA were treated with rapamycin for 6 h, and subjected to immunoprecipitation analysis as described in Fig. 5c.

The experiments were repeated independently twice (c, e, f).



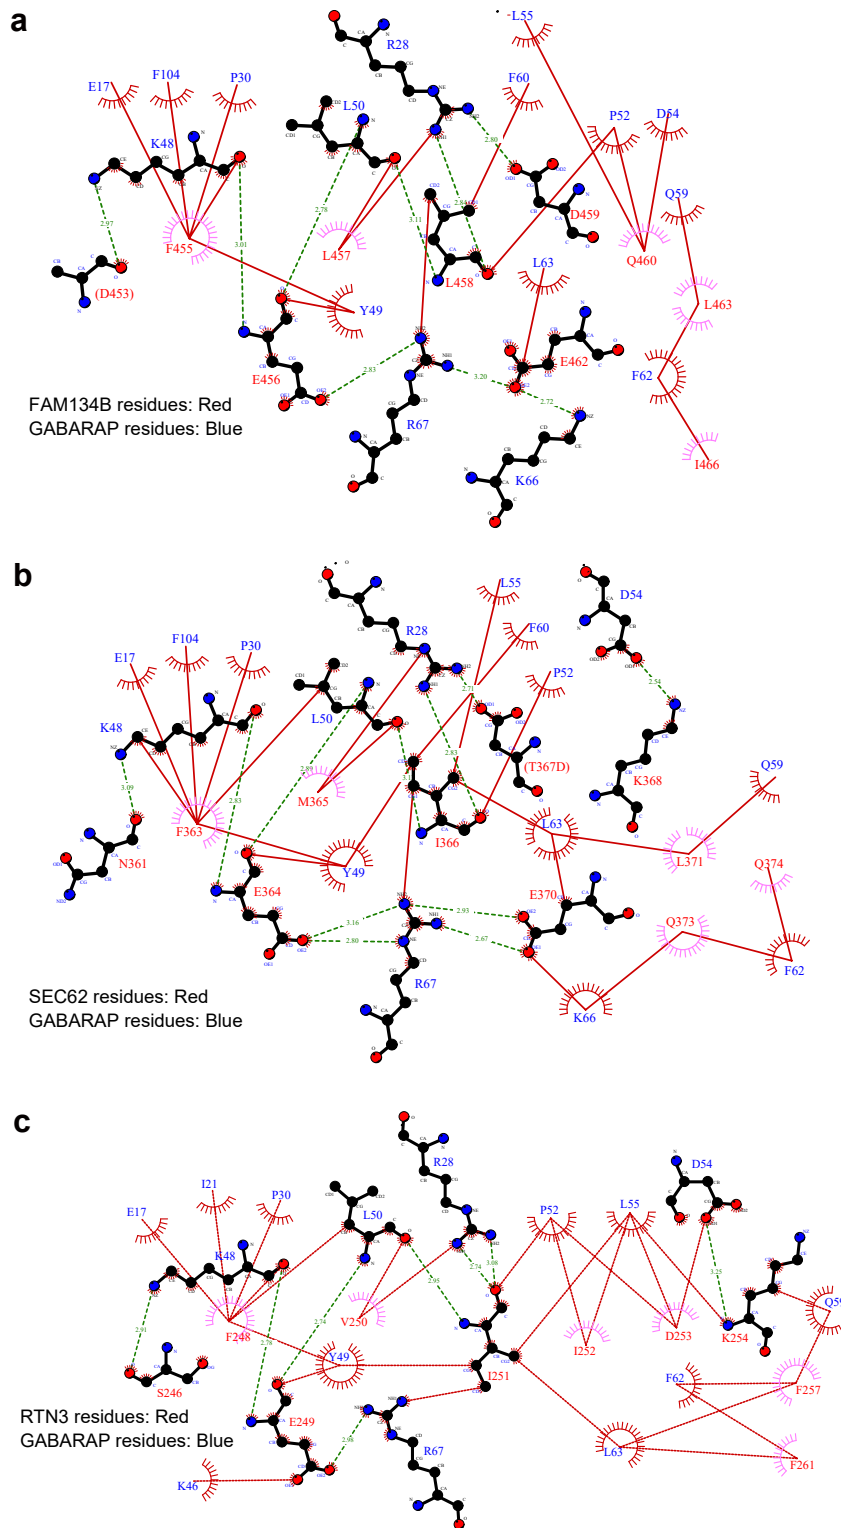

**Supplementary Fig. 7.** Interactions in FAM134B<sup>450-468</sup>-GABARAP, SEC62<sup>361-376</sup>-GABARAP, and RTN3<sup>245-264</sup>-GABARAP

**a-c.** Two-dimensional protein–protein interaction diagrams for FAM134B<sup>450-468</sup>-GABARAP (a), SEC62<sup>361-376</sup>-GABARAP (b), and RTN3<sup>245-264</sup>-GABARAP (c).

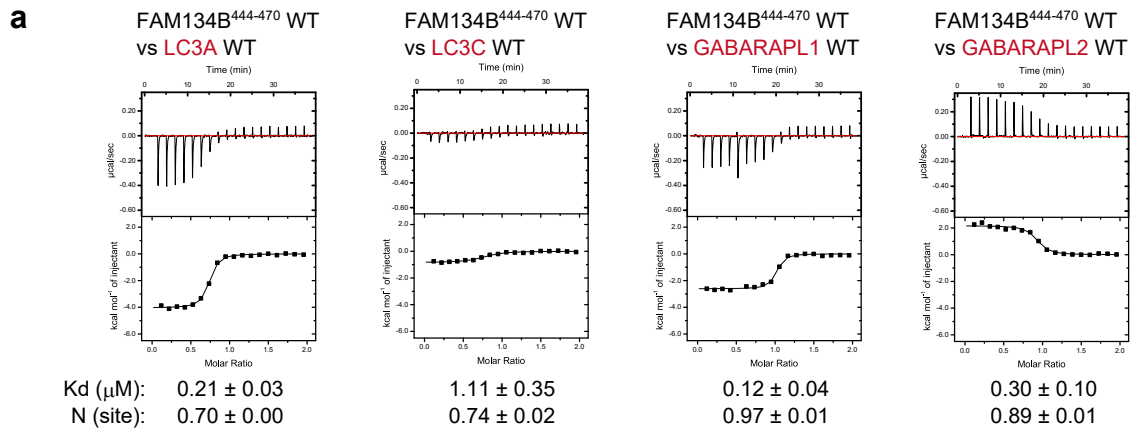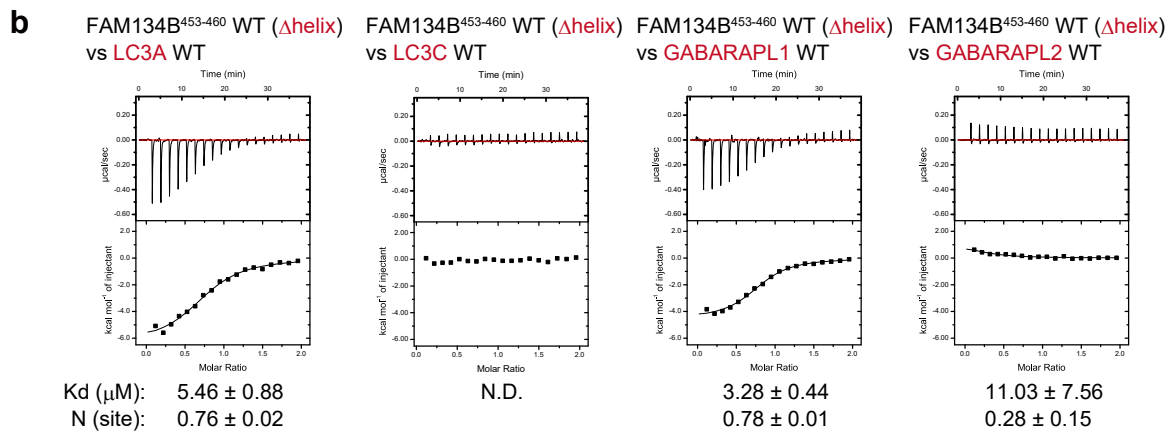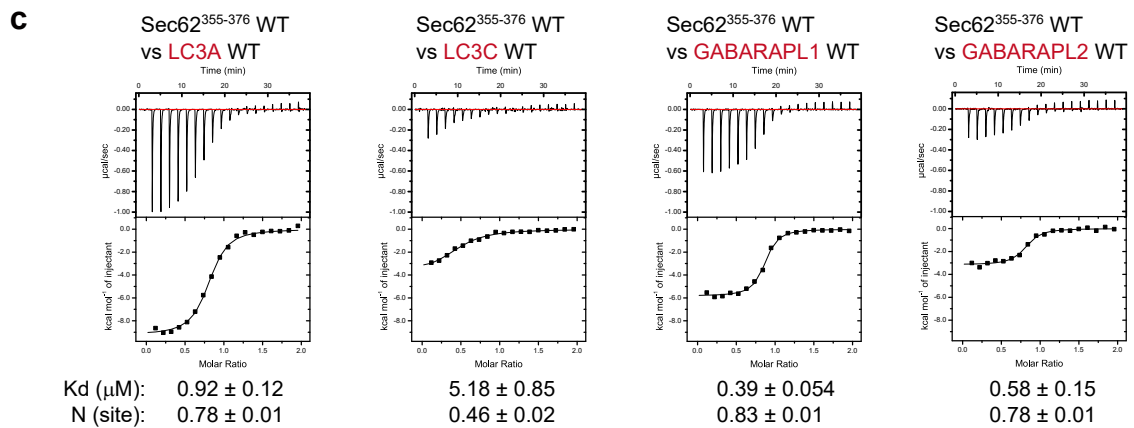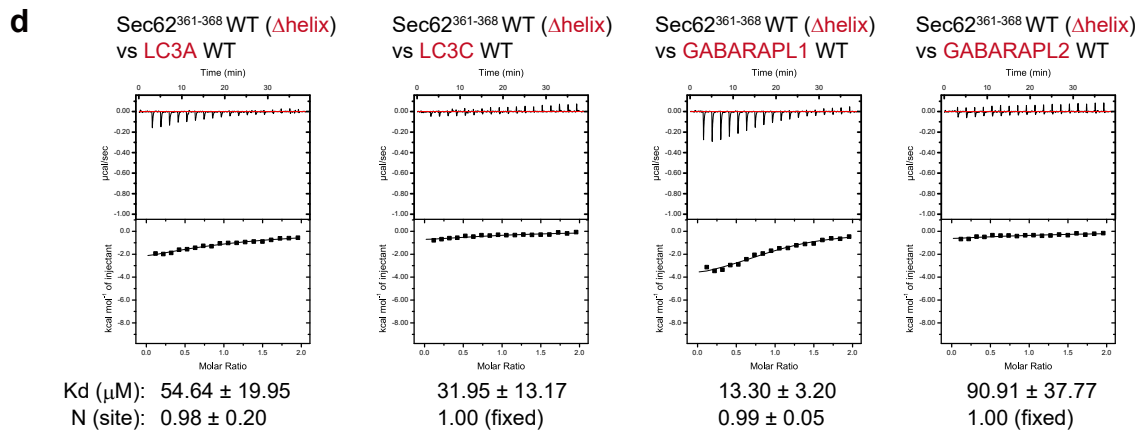

**Supplementary Fig. 8.** ITC analysis of the interactions of FAM134B and SEC62 peptides with mammalian Atg8 homologues.

**a–d.** The binding affinity of FAM134B<sup>444-470</sup> (a), FAM134B<sup>453-460</sup> (b), SEC62<sup>355-376</sup> (c), and SEC62<sup>361-368</sup> (d) peptides to mammalian Atg8 homologues was measured by ITC.



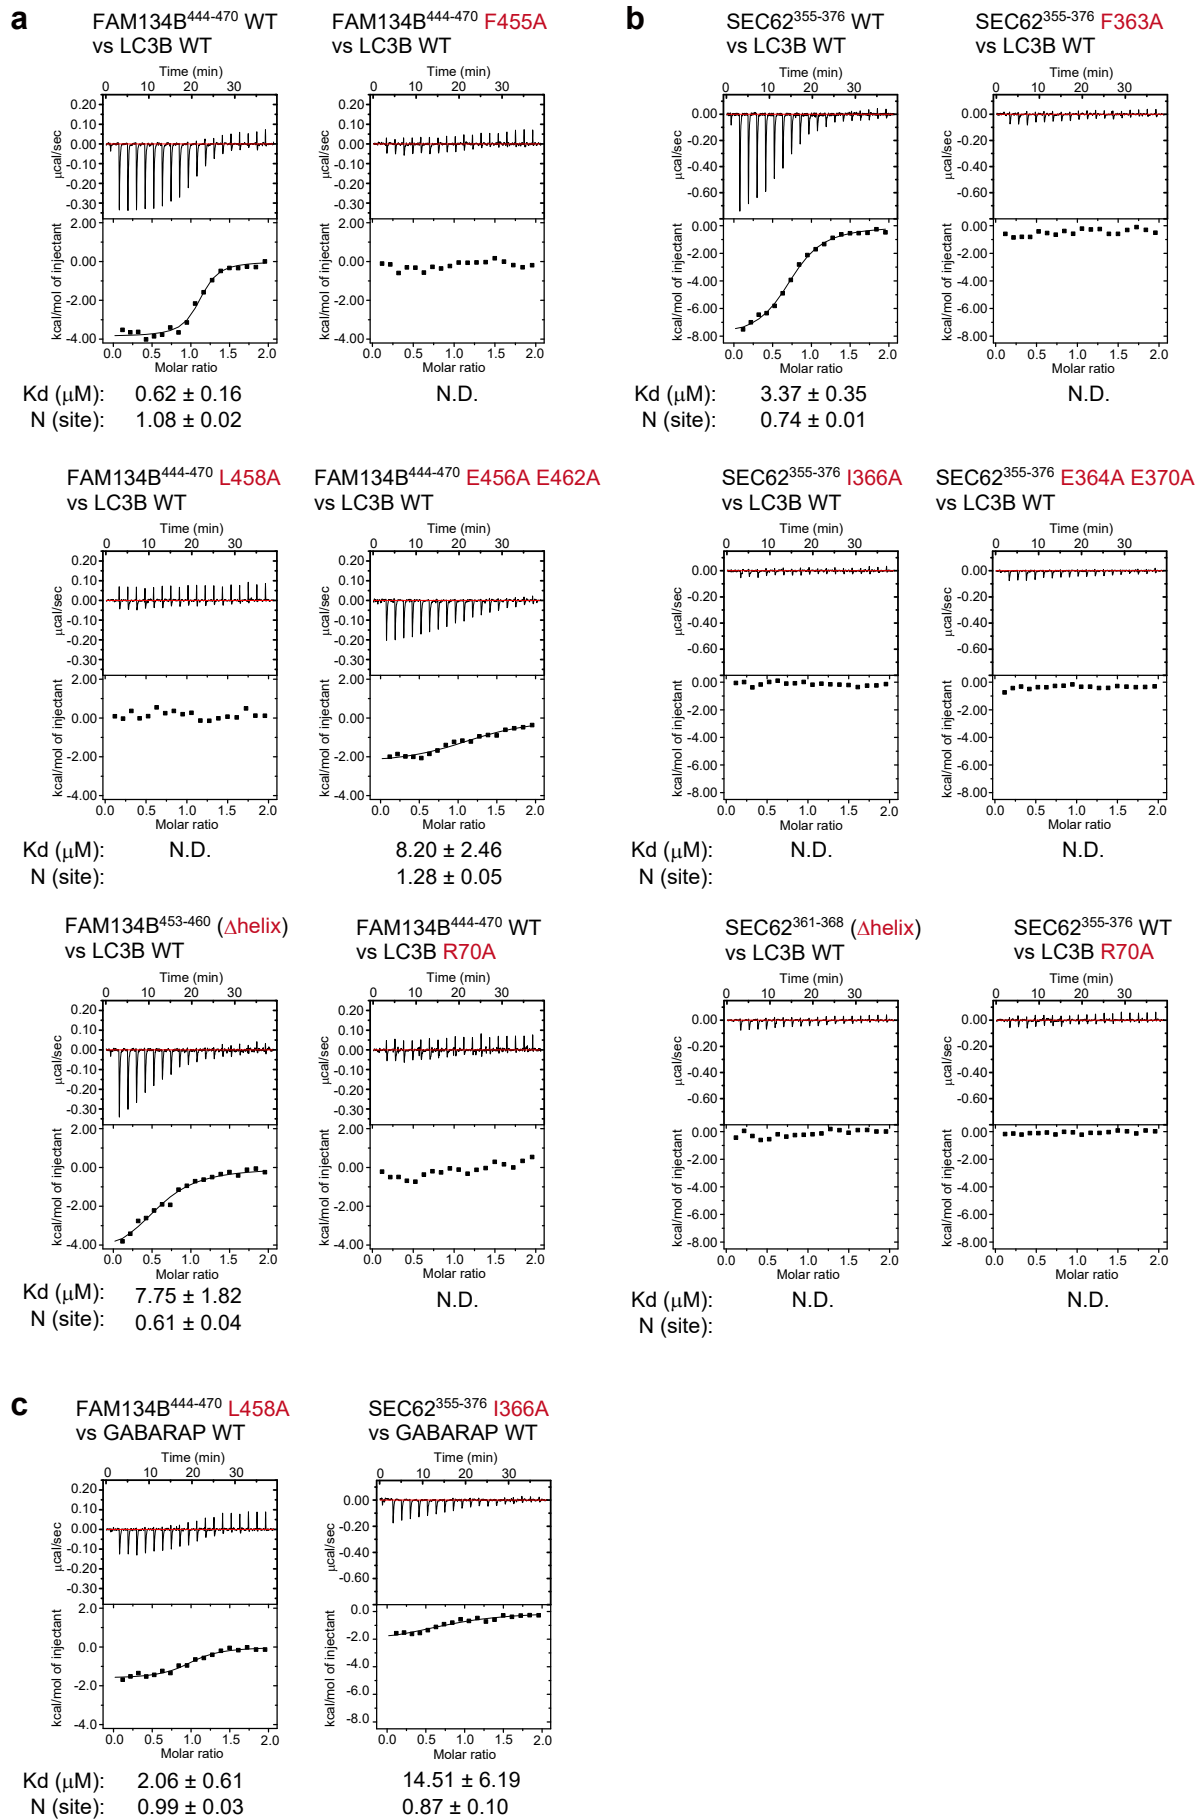

**Supplementary Fig. 9.** ITC analysis of the interactions of FAM134B and SEC62 peptides with GABARAP/LC3B. **a–c.** The binding affinity of FAM134B and SEC62 peptides to LC3B (a, b) or GABARAP (c) was measured by ITC.

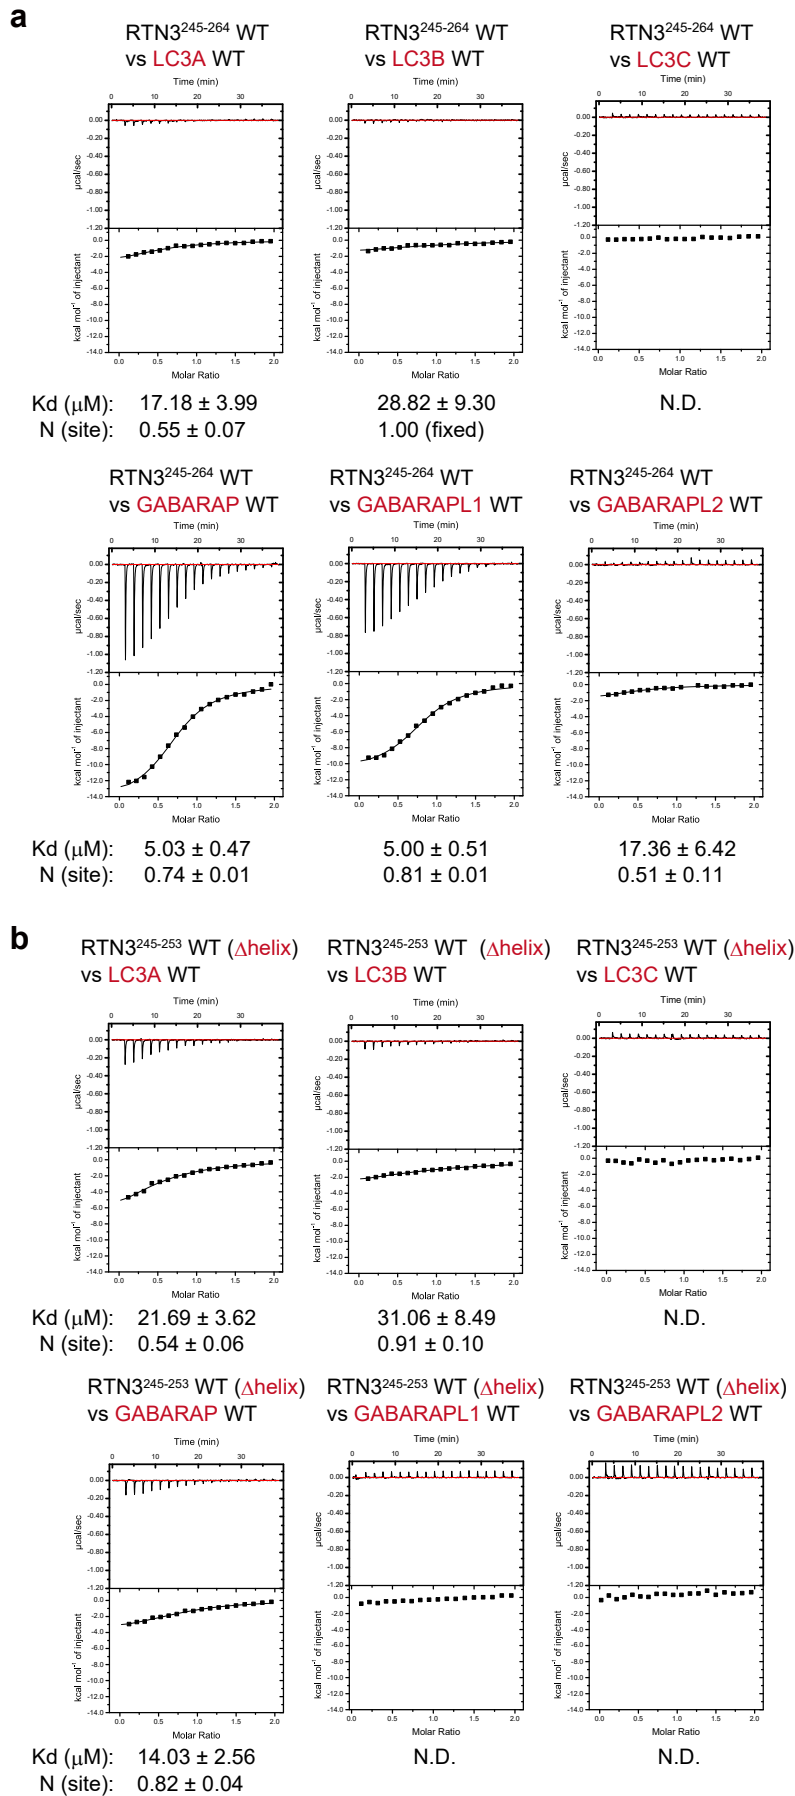

**Supplementary Fig. 10.** ITC analysis of the interactions of RTN3 peptides with mammalian Atg8 homologues. **a, b.** The binding affinity of RTN3<sup>245-264</sup> (**a**) and RTN3<sup>245-253</sup> (**b**) peptides to mammalian Atg8 homologues was measured by ITC.

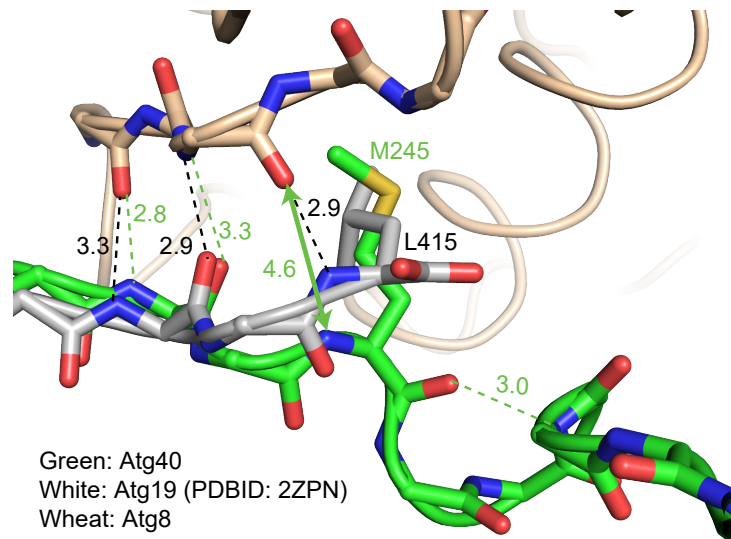

**Supplementary Fig. 11.** Comparing the structural configurations of the AIM-containing regions of Atg40 and Atg19 bound to Atg8. The structure of the Atg19 region bound to Atg8 (PDB ID: 2ZPN) was superimposed with that of the Atg40 region in complex with Atg8.



**Supplementary Table 1. Yeast strains used in this study**

| Name    | Genotype                                                                                                                      | Background | Figure             |
|---------|-------------------------------------------------------------------------------------------------------------------------------|------------|--------------------|
| YKM752  | <i>atg8Δ::TRP1 atg4Δ::hphNT1 atg40Δ::natNT2</i>                                                                               | BJ3505     | 1a                 |
| YKM770  | <i>SEC63-EGFP-kanMX4</i>                                                                                                      | BY4741     | 1b                 |
| YKM1079 | <i>SEC63-EGFP-kanMX4 rtn1Δ::zeoNT3 rtn2Δ::hphNT1 yop1Δ::natNT2 atg40Δ::CgHIS3</i>                                             | BY4741     | 1b                 |
| YKM1964 | <i>ADE2 ura3::ADH1pro-OsTIR1-9Myc-URA3 spo7-aid*-3HA-hphNT1</i>                                                               | W303-1A    | 1c, Suppl<br>1d    |
| YKM1965 | <i>ADE2 ura3::ADH1pro-OsTIR1-9Myc-URA3 spo7-aid*-3HA-hphNT1 rtn1Δ::kanMX4 yop1Δ::zeoNT3</i>                                   | W303-1A    | 1c, Suppl<br>1d    |
| YKM1979 | <i>ADE2 ura3::ADH1pro-OsTIR1-9Myc-URA3 spo7-aid*-3HA-hphNT1 rtn1Δ::kanMX4 yop1Δ::zeoNT3 his3::pRS303-GPDpro-YOPI-mCherry</i>  | W303-1A    | 1c, Suppl<br>1d    |
| YKM1980 | <i>ADE2 ura3::ADH1pro-OsTIR1-9Myc-URA3 spo7-aid*-3HA-hphNT1 rtn1Δ::kanMX4 yop1Δ::zeoNT3 his3::pRS303-GPDpro-ATG40-mCherry</i> | W303-1A    | 1c, Suppl<br>1d    |
| YKM939  | <i>SEC63-EGFP-kanMX4 atg40Δ::natNT2</i>                                                                                       | BY4741     | 2b, c,<br>Suppl 1c |
| YKM2064 | <i>ADE2 leu2::GFPplus-ATG8-hphNT1 atg40Δ::zeoNT3 his3::pRS303-CUP1pro-ATG40-mCherry</i>                                       | W303-1A    | 2d, Suppl<br>2b    |
| YKM2066 | <i>ADE2 leu2::GFPplus-ATG8-hphNT1 atg40Δ::zeoNT3 his3::pRS303-TEFpro-TMD-GST-40C-mCherry</i>                                  | W303-1A    | 2d, Suppl<br>2b    |
| YKM2067 | <i>ADE2 leu2::GFPplus-ATG8-hphNT1 atg40Δ::zeoNT3 his3::pRS303-TEFpro-TMD-40C-CC<sup>dimer</sup>-mCherry</i>                   | W303-1A    | 2d, Suppl<br>2b    |
| YKM2068 | <i>ADE2 leu2::GFPplus-ATG8-hphNT1 atg40Δ::zeoNT3 his3::pRS303-TEFpro-TMD-40C-CC<sup>trimer</sup>-mCherry</i>                  | W303-1A    | 2d, Suppl<br>2b    |
| YKM2069 | <i>ADE2 leu2::GFPplus-ATG8-hphNT1 atg40Δ::zeoNT3 his3::pRS303-TEFpro-TMD-40C-mCherry</i>                                      | W303-1A    | 2d, Suppl<br>2b    |
| YKM1931 | <i>ADE2 leu2::GFPplus-ATG8-hphNT1 his3::DsRed-HDEL-HIS3 atg40Δ::zeoNT3</i>                                                    | W303-1A    | 2e                 |
| YKM1560 | <i>ADE2 ATG40-EGFP-kanMX6 ypt7Δ::mCherry-ATG8 (G116)-zeoNT3</i>                                                               | W303-1A    | 3a                 |
| YKM2076 | <i>ADE2 ATG40-EGFP-kanMX6 ypt7Δ::mCherry-ATG8 (G116)-zeoNT3 atg1Δ::hphNT1</i>                                                 | W303-1A    | 3a                 |
| YKM1470 | <i>ATG40-EGFP-kanMX6 ATG1-2xmCherry-hphNT1</i>                                                                                | BY4741     | 3b, c              |

|         |                                                                                                                                                                       |         |                  |
|---------|-----------------------------------------------------------------------------------------------------------------------------------------------------------------------|---------|------------------|
| YKM1562 | <i>ATG40-EGFP-kanMX6 ATG1-2xmCherry-hphNT1 atg2Δ::zeoNT3</i>                                                                                                          | BY4741  | 3b               |
| YKM1564 | <i>ATG40-EGFP-kanMX6 ATG1-2xmCherry-hphNT1 atg8Δ::zeoNT3</i>                                                                                                          | BY4741  | 3b               |
| YKM1581 | <i>ATG40-EGFP-kanMX6 ATG1-2xmCherry-hphNT1 atg14Δ::zeoNT3</i>                                                                                                         | BY4741  | 3b               |
| YKM1807 | <i>atg40(Y242A M245A)-EGFP-kanMX6 ATG1-2xmCherry-hphNT1</i>                                                                                                           | BY4741  | 3c               |
| YKM1387 | <i>kanMX4-ADHpro(truncated)-ATG40-mCherry-hphNT1 his3::GFP-ATG8 (G116)-zeoNT3</i>                                                                                     | BY4741  | 3d               |
| YKM792  | <i>ATG40-TEV-3FLAG-kan</i>                                                                                                                                            | BJ3505  | 4b               |
| YKM1709 | <i>ATG40-TEV-3FLAG-kan atg1Δ::zeoNT3</i>                                                                                                                              | BJ3505  | 4b               |
| YKM1670 | <i>ATG40-TEV-3FLAG-kan atg2Δ::zeoNT3</i>                                                                                                                              | BJ3505  | 4b               |
| YKM1657 | <i>ATG40-TEV-3FLAG-kan atg8Δ::zeoNT3</i>                                                                                                                              | BJ3505  | 4b               |
| YKM1674 | <i>atg40 (Y242A M245A)-TEV-3FLAG-kan</i>                                                                                                                              | BJ3505  | 4b               |
| YKM1868 | <i>ADE2 leu2::pACT1-Z4EV-NAT-leu2d0-int kanMX4-ADHpro(truncated)-ATG40-mCherry-zeoNT3 ura3::pRS306-Z4EVpro-4xATG8 (G116A)-EGFP</i>                                    | W303-1A | 4c               |
| YKM1869 | <i>ADE2 leu2::pACT1-Z4EV-NAT-leu2d0-int kanMX4-ADHpro(truncated)-atg40 (Y242A M245A)-mCherry-zeoNT3 ura3::pRS306-Z4EVpro-4xATG8 (G116A)-EGFP</i>                      | W303-1A | 4c               |
| YKM1988 | <i>ADE2 leu2::pACT1-Z4EV-NAT-leu2d0-int atg40Δ::zeoNT3 ura3::pRS306-Z4EVpro-4xATG8(G116A)-EGFP YOP1-2xmCherry-hphNT1 his3::pRS303-ADHpro-ATG40-mTurquoise2</i>        | W303-1A | 4d               |
| YKM2062 | <i>ADE2 leu2::pACT1-Z4EV-NAT-leu2d0-int atg40Δ::zeoNT3 ura3::pRS306-Z4EVpro-4xATG8 (G116A)-EGFP his3::pRS303-TEFpro-TMD-GST-40C-mTurquoise2 YOP1-2xmCherry-hphNT1</i> | W303-1A | 4e               |
| YKM1948 | <i>ADE2 ypt7Δ:2xmTagBFP2-ATG8-hphNT1 YOP1-2xmNeonGreen-zeoNT3 his3::pRS303-ADHpro (truncated)-ATG40-mCherry</i>                                                       | W303-1A | 4f               |
| YKM1978 | <i>ADE2 ypt7Δ:2xmTagBFP2-ATG8-hphNT1 his3::pRS303-ADHpro (truncated)-ATG40-mCherry ura3::pRS306-ADHpro-GFP-HDEL</i>                                                   | W303-1A | 4f               |
| YKM1638 | <i>ATG8-EGFP-kanMX6 atg4Δ::hphNT1 atg40Δ::natNT2</i>                                                                                                                  | BJ3505  | 5c, Suppl 2a, 6e |
| YKM853  | <i>RTN1-EGFP-kanMX4 atg40Δ::natNT2</i>                                                                                                                                | BY4741  | Suppl 1a, 6c, 6f |
| YKM777  | <i>SEC63-mCherry-kan rtn1Δ::zeoNT3 rtn2Δ::hphNT1 yop1Δ::natNT2 ATG40-EGFP-HIS3MX6</i>                                                                                 | BY4741  | Suppl 1b         |
| YKM936  | <i>SEC63-EGFP-kanMX4</i>                                                                                                                                              | BY4741  | Suppl 1c         |

|         |                                                                                                                                                                           |         |                 |
|---------|---------------------------------------------------------------------------------------------------------------------------------------------------------------------------|---------|-----------------|
| YKM1653 | <i>atg8Δ::EGFP-kanMX6 atg4Δ::hphNT1 atg40Δ::natNT2</i>                                                                                                                    | BJ3505  | Suppl 2a,<br>6e |
| YKM1475 | <i>kanMX4-ADHpro (truncated)-ATG40-mCherry-hphNT1 his3::GFP-ATG8 (G116)-zeoNT3 YOP1-2xmTagBFP2-HIS3MX6</i>                                                                | BY4741  | Suppl 3a        |
| YKM1153 | <i>ATG8 wt-T-P-kanMX ATG40-EGFP-HIS3MX6 ATG1-2xmCherry-hphNT1</i>                                                                                                         | BY4741  | Suppl 3b        |
| YKM1154 | <i>atg8 (P52A R67A)-T-P-kanMX ATG40-EGFP-HIS3MX6 ATG1-2xmCherry-hphNT1</i>                                                                                                | BY4741  | Suppl 3b        |
| YKM2086 | <i>ADE2 leu2::pACT1-Z4EV-NAT-leu2d0-int kanMX4-ADHpro (truncated)-ATG40-mCherry-hphNT1 ura3::pRS306-Z4EVpro-EGFP-Atg8 (K26P)-CC<sup>tetramer</sup> atg4Δ::zeoNT3</i>      | W303-1A | Suppl 4a        |
| YKM1986 | <i>ADE2 leu2::pACT1-Z4EV-NAT-leu2d0-int atg40Δ::zeoNT3 ura3::pRS306-Z4EVpro-4xATG8 (G116A)-EGFP RTN1-2xmCherry-hphNT1 his3::pRS303-ADHpro-ATG40-mTurquoise2</i>           | W303-1A | Suppl 4b        |
| YKM1987 | <i>ADE2 leu2::pACT1-Z4EV-NAT-leu2d0-int atg40Δ::zeoNT3 ura3::pRS306-Z4EVpro-4xATG8 (G116A)-EGFP trp1::DsRed-Express2-HDEL his3::pRS303-ADHpro-ATG40-mTurquoise2</i>       | W303-1A | Suppl 4b        |
| YKM2060 | <i>ADE2 leu2::pACT1-Z4EV-NAT-leu2d0-int atg40Δ::zeoNT3 ura3::pRS306-Z4EVpro-4xATG8 (G116A)-EGFP his3::pRS303-TEFpro-TMD-GST-40C-mTurquoise2 RTN1-2xmCherry-hphNT1</i>     | W303-1A | Suppl 4c        |
| YKM2063 | <i>ADE2 leu2::pACT1-Z4EV-NAT-leu2d0-int atg40Δ::zeoNT3 ura3::pRS306-Z4EVpro-4xATG8 (G116A)-EGFP his3::pRS303-TEFpro-TMD-GST-40C-mTurquoise2 trp1::DsRed-Express2-HDEL</i> | W303-1A | Suppl 4c        |



**Supplementary Table 2. Plasmids used in this study**

| Name   | Description                                                           |
|--------|-----------------------------------------------------------------------|
| pKE135 | pRS426- <i>ATG40</i> -6HA                                             |
| pKE182 | pRS426- <i>ATG40</i> (C98A)-6HA                                       |
| pKE183 | pRS426- <i>ATG40</i> (F2C)-6HA                                        |
| pKE184 | pRS426- <i>ATG40</i> (L4C)-6HA                                        |
| pKE185 | pRS426- <i>ATG40</i> (S35C)-6HA                                       |
| pKE186 | pRS426- <i>ATG40</i> (S113C)-6HA                                      |
| pKE255 | pRS316- <i>CUP1</i> pro- <i>ATG40</i> -mCherry                        |
| pKE256 | pRS316- <i>CUP1</i> pro- <i>YOP1</i> -40C-mCherry                     |
| pKE273 | pRS316- <i>CUP1</i> pro- <i>YOP1</i> -40C <sup>AIM mut</sup> -mCherry |
| pKE257 | pRS316- <i>CUP1</i> pro- <i>YOP1</i> -mCherry                         |
| pKE258 | pRS316- <i>CUP1</i> pro- <i>RTN1</i> -40C-mCherry                     |
| pKE274 | pRS316- <i>CUP1</i> pro- <i>RTN1</i> -40C <sup>AIM mut</sup> -mCherry |
| pKE259 | pRS316- <i>CUP1</i> pro- <i>RTN1</i> -mCherry                         |
| pKE360 | p416- <i>TEF</i> pro- <i>TMD</i> -40C-mCherry                         |
| pKE387 | p416- <i>TEF</i> pro- <i>TMD</i> - <i>GST</i> -40C-mCherry            |
| pKE389 | p416- <i>TEF</i> pro- <i>TMD</i> -CC <sup>dimer</sup> -40C-mCherry    |
| pKE390 | p416- <i>TEF</i> pro- <i>TMD</i> -CC <sup>trimer</sup> -40C-mCherry   |
| pKE422 | pRS314- <i>TEF</i> pro- <i>TMD</i> - <i>GST</i> -40C-mTagBFP2         |
| pKE92  | pRS316- <i>ATG40</i>                                                  |
| pKE93  | pRS316- <i>ATG40</i> -EGFP                                            |
| pKE131 | pRS316- <i>atg40</i> (Y242A M245A)-EGFP                               |
| pKE108 | pRS314- <i>ATG40</i> -6HA                                             |
| pKE117 | pRS314- <i>atg40</i> (Y242A M245A)-6HA                                |
| pKE321 | pRS316- <i>ATG40</i> -6HA                                             |
| pKE342 | pRS316- <i>atg40</i> (1-239)-6HA                                      |
| pKE343 | pRS316- <i>atg40</i> (1-239)-LTWEEL-6HA                               |
| pKE344 | pRS316- <i>atg40</i> (1-239)-FTWEEI-6HA                               |
| pKE424 | pRS316- <i>atg40</i> (F238A)-6HA                                      |
| pKE425 | pRS316- <i>atg40</i> (Y242A)-6HA                                      |
| pKE426 | pRS316- <i>atg40</i> (D243A)-6HA                                      |
| pKE427 | pRS316- <i>atg40</i> (M245A)-6HA                                      |
| pKE428 | pRS316- <i>atg40</i> (1-245)-6HA                                      |

|        |                                                               |
|--------|---------------------------------------------------------------|
| pKE435 | pRS316- <i>atg40 (D247A)</i> -6HA                             |
| pKE436 | pRS316- <i>atg40 (Y242A M245A)</i> -6HA                       |
| -      | pFA6a- <i>AID</i> *-3HA- <i>hphNT1</i>                        |
| pKE340 | pRS303- <i>GPDpro-ATG40-mCherry</i>                           |
| pKE341 | pRS303- <i>GPDpro-YOP1-mCherry</i>                            |
| pKE296 | pRS303- <i>CUP1pro-ATG40-mCherry</i>                          |
| pKE537 | pRS303- <i>TEFpro-TMD-GST-40C-mCherry</i>                     |
| pKE538 | pRS303- <i>TEFpro-TMD-40C-CC<sup>dimer</sup>-mCherry</i>      |
| pKE539 | pRS303- <i>TEFpro-TMD-40C-CC<sup>trimer</sup>-mCherry</i>     |
| pKE540 | pRS303- <i>TEFpro-TMD-40C-mCherry</i>                         |
| pKE349 | pRS306- <i>Z4EVpro-4xATG8-EGFP</i>                            |
| pKE496 | pRS303- <i>ADHpro (truncated)-ATG40-mTurquoise2</i>           |
| pKE536 | pRS303- <i>TEFpro-TMD-GST-40C-mTurquoise2</i>                 |
| pKE212 | pRS306- <i>ADHpro-GFP-HDEL</i>                                |
| pKE557 | pRS306- <i>Z4EVpro-EGFP-Atg8 (K26P)-CC<sup>tetramer</sup></i> |

**Supplementary Table 3. Oligonucleotides used in this study**

| Name                    | Sequence                                              |
|-------------------------|-------------------------------------------------------|
| ATG40-C98A-Fw           | tcgtttggaagtattGCTtgacaagagagctg                      |
| ATG40-C98A-Rv           | cagctctctgtcaaAGCaatactccaacga                        |
| ATG40-F2C-Fw            | catagaaaactaatgTGTaatttaatttatgg                      |
| ATG40-F2C-Rv            | ccataaaattaaattACAattagtttctatg                       |
| ATG40-L4C-Fw            | aaactaatgtttaatTGTattttatggccctta                     |
| ATG40-L4C-Rv            | taaggccataaaatACAattaacattagttt                       |
| ATG40-S35C-Fw           | tctccgttgacttcTGTaaggcaagtgtgct                       |
| ATG40-S35C-Rv           | agcagcacttgccctACAgaagtcaacggaaga                     |
| ATG40-S113C-Fw          | attgcctttatggaaTGTcaaaacaagcttacc                     |
| ATG40-S113C-Rv          | ggtaagctgttttgACAttccataaaggcaat                      |
| ATG40 (1-239)-Fw        | ACCAGCACTGAGTTCCCCGggtggtgcagcaggagga                 |
| ATG40 (1-239)-Rv        | tctcctgctgcaccaccCGGGAAGTCAGTGCTGGT                   |
| ATG40 (1-239)-LTWEEL-Fw | accagcactgagttcccCTGACTTGGGAAGAACTCggtggtgcagcaggagga |
| ATG40 (1-239)-LTWEEL-Rv | tctcctgctgcaccaccGAGTTCTTCCCAAGTCAGcgggaactcagtgtggt  |
| ATG40 (1-239)-FTWEEI-Fw | accagcactgagttcccTTTACTTGGGAAGAAATAggtggtgcagcaggagga |
| ATG40 (1-239)-FTWEEI-Rv | tctcctgctgcaccaccTATTTCTTCCCAAGTAAAcgggaactcagtgtggt  |
| ATG40-F238A-Fw          | caaaatftaccagcactgagGCTccgaatgattatgatttatg           |
| ATG40-F238A-Rv          | cataaaatcataatcattcggAGCctcagtgtgtaaaatfttg           |
| ATG40-Y242A-Fw          | gagttcccgaatgatGCTgatttatggaggatattc                  |
| ATG40-Y242A-Rv          | gaatatcctcataaaatcAGCattcgggaactc                     |
| ATG40-D243A-Fw          | gtcccgaatgattatGCTtttatggaggatattctag                 |
| ATG40-D243A-Rv          | ctagaatatcctcataaaAGCataatcattcgggaac                 |
| ATG40-M245A-Fw          | cccgaatgattatgattttGCTgaggatattctagatgag              |
| ATG40-M245A-Rv          | ctcatctagaatcctcAGCaaaatcataatcattcggg                |
| ATG40-D247A-Fw          | tatgatttatggagGCTattctagatgagaca                      |
| ATG40-D247A-Rv          | tgtctcatctagaatAGCctccataaaatcata                     |
| ATG40-Y242A M245A-Fw    | gagttcccgaatgatGCTgattttGCTgaggatattctagat            |
| ATG40-Y242A M245A-Rv    | atctagaatcctcAGCaaaatcAGCattcgggaactc                 |

|                  |                                        |
|------------------|----------------------------------------|
| ATG40 (1-245)-Fw | CCGAATGATTATGATTTTATGggtggtgcagcaggag  |
| ATG40 (1-245)-Rv | ctcctgctgcaccaccCATAAAATCATAATCATTTCGG |

**Supplementary Table 4. Peptides used in ITC experiments**

| Peptides                                     | Production     | Sequence                       |
|----------------------------------------------|----------------|--------------------------------|
| Atg40 <sup>237-252</sup> WT                  | <i>E. coli</i> | GPEFPNDYDFMEDILDET             |
| Atg40 <sup>237-252</sup> M245A               | Synthesis      | EFPNDYDFAEDILDET               |
| Atg40 <sup>237-252</sup> D243A D247A         | Synthesis      | EFPNDYAFMEAILDET               |
| Atg40 <sup>234-252</sup> WT                  | Synthesis      | YTSTEFNPNDYDFMEDILDET          |
| Atg40 <sup>234-252</sup> F238A               | Synthesis      | YTSTEAPNDYDFMEDILDET           |
| Atg40 <sup>234-252</sup> Y242A               | Synthesis      | YTSTEFNDADFMEDILDET            |
| FAM134B <sup>444-470</sup> WT                | <i>E. coli</i> | GPEEDTDTEEGDDFELLDQSELDQIESELY |
| FAM134B <sup>453-460</sup> ( $\Delta$ helix) | Synthesis      | DDFELLDQY                      |
| FAM134B <sup>444-470</sup> F455A             | <i>E. coli</i> | GPEEDTDTEEGDDAELLDQSELDQIESELY |
| FAM134B <sup>444-470</sup> L458A             | <i>E. coli</i> | GPEEDTDTEEGDDFELADQSELDQIESELY |
| FAM134B <sup>444-470</sup> E456A E462A       | <i>E. coli</i> | GPEEDTDTEEGDDFALLDQSALDQIESELY |
| SEC62 <sup>355-376</sup> WT                  | <i>E. coli</i> | GPHSSGNGNDFEMITKEELEQQTDY      |
| SEC62 <sup>361-368</sup> ( $\Delta$ helix)   | Synthesis      | NDFEMITKY                      |
| SEC62 <sup>355-376</sup> F363A               | <i>E. coli</i> | GPHSSGNGNDAEMITKEELEQQTDY      |
| SEC62 <sup>355-376</sup> I366A               | <i>E. coli</i> | GPHSSGNGNDFEMATKEELEQQTDY      |
| SEC62 <sup>355-376</sup> E364A E370A         | <i>E. coli</i> | GPHSSGNGNDFAMITKEALEQQTDY      |
| RTN3 <sup>245-264</sup>                      | Synthesis      | ESPFEVIIDKAAFDKEFKDSY          |
| RTN3 <sup>245-253</sup>                      | Synthesis      | YESPFEVIID                     |

**Supplementary Table 5. Data collection and refinement statistics**

|                                                     | Atg40 <sup>237-252</sup> -<br>Atg8  | FAM134B <sup>450</sup> -<br>468-<br>GABARAP | Sec62 <sup>361-376</sup> -<br>GABARAP                 | RTN3 <sup>245-264</sup> -<br>GABARAP     |
|-----------------------------------------------------|-------------------------------------|---------------------------------------------|-------------------------------------------------------|------------------------------------------|
| <b>Data collection</b>                              |                                     |                                             |                                                       |                                          |
| Space group                                         | <i>P</i> 3 <sub>2</sub> 2 1         | <i>P</i> 6 <sub>3</sub>                     | <i>P</i> 2 <sub>1</sub> 2 <sub>1</sub> 2 <sub>1</sub> | <i>P</i> 4 <sub>1</sub> 2 <sub>1</sub> 2 |
| Cell dimensions                                     |                                     |                                             |                                                       |                                          |
| <i>a</i> , <i>b</i> , <i>c</i><br>(Å)               | 74.72, 74.72,<br>57.09              | 81.89, 81.89,<br>33.32                      | 42.89, 42.89,<br>144.01                               | 137.41,<br>137.41, 67.44                 |
| α, β, γ (°)                                         | 90, 90, 120                         | 90, 90, 120                                 | 90, 90, 90                                            | 90, 90, 90                               |
| Resolution (Å)                                      | 37.36 – 2.231<br>(2.311 –<br>2.231) | 40.95 – 1.404<br>(1.454 –<br>1.404)         | 41.10 – 1.999<br>(2.071 –<br>1.999)                   | 45.43 – 2.149<br>(2.226 –<br>2.149)      |
| <i>R</i> <sub>merge</sub>                           | 0.1406<br>(0.5954)                  | 0.0741<br>(0.6313)                          | 0.1638<br>(0.9200)                                    | 0.0723<br>(0.8381)                       |
| <i>I</i> / σ <i>I</i>                               | 13.78 (2.44)                        | 18.80 (2.68)                                | 9.27 (2.02)                                           | 20.14 (2.43)                             |
| Completeness<br>(%)                                 | 99.58 (97.91)                       | 97.71 (82.68)                               | 99.73 (98.34)                                         | 99.87 (99.28)                            |
| Redundancy                                          | 9.6 (7.3)                           | 9.7 (6.5)                                   | 6.5 (5.8)                                             | 13.2 (13.4)                              |
| <b>Refinement</b>                                   |                                     |                                             |                                                       |                                          |
| Resolution (Å)                                      | 37.36 – 2.231                       | 40.95 – 1.404                               | 41.10 – 1.999                                         | 45.43-2.149                              |
| No. reflections                                     | 9227                                | 24601                                       | 18676                                                 | 35698                                    |
| <i>R</i> <sub>work</sub> / <i>R</i> <sub>free</sub> | 0.2042 /<br>0.2199                  | 0.1915 /<br>0.2061                          | 0.1656 /<br>0.1836                                    | 0.2062 /<br>0.2299                       |
| No. atoms                                           |                                     |                                             |                                                       |                                          |
| Protein                                             | 1076                                | 1106                                        | 2172                                                  | 3272                                     |
|                                                     | 21                                  | 6                                           |                                                       | 30                                       |
| Ligand/ion                                          |                                     |                                             |                                                       |                                          |
| Water                                               | 42                                  | 105                                         | 291                                                   | 96                                       |
| <i>B</i> -factors                                   |                                     |                                             |                                                       |                                          |
| Protein                                             | 45.99                               | 28.92                                       | 30.61                                                 | 72.17                                    |

|             |       |       |       |        |
|-------------|-------|-------|-------|--------|
|             | 54.62 | 44.45 |       | 124.31 |
| Ligand/ion  |       |       |       |        |
| Water       | 44.72 | 38.64 | 34.55 | 57.28  |
| R.m.s.      |       |       |       |        |
| deviations  |       |       |       |        |
| Bond        | 0.008 | 0.006 | 0.007 | 0.008  |
| lengths (Å) |       |       |       |        |
| Bond        | 1.29  | 0.79  | 0.91  | 1.18   |
| angles (°)  |       |       |       |        |

---

\*Number of xtals for each structure is one. \*Values in parentheses are for highest-resolution shell.



## Supplementary ImageJ Script 1

//Z-stack images of Atg1-mCherry and Atg40-GFP were named as "Atg1-mCherry.tif" and "Atg40-GFP.tif", respectively

//find Atg1-mCherry puncta and create a mask image

```
selectWindow("Atg1-mCherry.tif");
run("Find Maxima...", "noise=500 output=[Single Points] exclude");
run("Find Maxima...", "noise=0 output=[Point Selection] exclude");
getSelectionCoordinates(xpoints, ypoints);
radius=2.5;
for (XY=0; XY<lengthOf(xpoints); XY++) {
    makeOval(xpoints[XY]-radius+0.5, ypoints[XY]-radius+0.5, 2*radius, 2*radius);
    run("Fill", "slice");
}
rename("Atg1-mCherry-mask");
```

//find Atg40-GFP puncta and create a mask image

```
selectWindow("Atg40-GFP.tif");
run("Find Maxima...", "noise=5000 output=[Single Points] exclude");
rename("Atg40-GFP-mask");
```

//extract Atg40-GFP puncta that colocalize with Atg1-mCherry puncta and count the number of these puncta

```
imageCalculator("Multiply create", "Atg1-mCherry-mask", "Atg40-GFP-mask");
rename("merge");
run("Analyze Particles...", "display");
```

## Supplementary ImageJ Script 2

//Z-stack images of Atg40-mCherry and GFP-HDEL/Yop1-mNeonGreen were named as "Atg40-mCherry.tif" and "GFP-mNG.tif", respectively

//find Atg40-mCherry puncta and store the ROIs

```
selectWindow("Atg40-mCherry.tif");
run("Select All");
run("Size...", "width=2880 height=2880 depth=1 constrain interpolation=Bilinear");
run("Find Maxima...", "noise=2500 output=[Single Points] exclude");
run("Find Maxima...", "noise=0 output=[Point Selection] exclude");
getSelectionCoordinates(xpoints, ypoints);
radius=3;
for (XY=0; XY<lengthOf(xpoints); XY++) {
    makeOval(xpoints[XY]-radius, ypoints[XY]-radius, 2*radius, 2*radius);
    run("Fill", "slice");
}
run("Select All");
run("Multiply...", "value=255.000");
run("Analyze Particles...", "add");
```

//measure the intensities of GFP-HDEL/Yop1-mNeonGreen colocalized with Atg40-mCherry-positive autophagosomes

```
selectWindow("GFP-mNG.tif");
run("Select All");
run("Size...", "width=2880 height=2880 depth=1 constrain interpolation=Bilinear");
num = roiManager("count");
roiManager("Show All");
for (n=0; n<=num-1; n++){
    roiManager("Select", n);
    roiManager("Measure");
};
```

### Supplementary ImageJ Script 3

```
//a Z-stack image of GFP-HDEL/Yop1-mNeonGreen was named as "GFP-mNG.tif"  
//find the GFP-HDEL/Yop1-mNeonGreen-positive ER regions and create a mask image  
selectWindow("GFP-mNG.tif");  
run("Select All");  
run("Size...", "width=2880 height=2880 depth=1 constrain interpolation=Bilinear");  
run("Duplicate...", "title=GFP-mNG-mask");  
setAutoThreshold("Moments dark");  
run("Convert to Mask");  
run("Create Selection");  
roiManager("Add");  
  
//measure the total intensity of GFP-HDEL/Yop1-mNeonGreen  
selectWindow("GFP-mNG.tif");  
roiManager("Measure");
```
