# Supplementary material for: Super-assembly of ER-phagy receptor Atg40 induces local ER remodeling at contacts with forming autophagosomal membranes
Source: PubMed Central journal article supplement (PMC7335187; doi:10.1038/s41467-020-17163-y), 2020-07-03
Supplement: 41467_2020_17163_MOESM4_ESM.pdf [file 41467_2020_17163_MOESM4_ESM.pdf]

**Supplementary Movie 1 | Coalesce of mCherry-Atg8-CC<sup>tetramer</sup>-SNAP-GST-40C liquid droplets.**

10  $\mu$ M mCherry-Atg8-CC<sup>tetramer</sup> was mixed with 10  $\mu$ M SNAP-GST-40C and observed under a confocal microscope.

Scale bars, 5  $\mu$ m
